# Supplementary material
Source: PubMed Central journal article supplement (PMC5637172)
Supplement: JB.00373-17_zjb999094537s1.pdf [file JB.00373-17_zjb999094537s1.pdf]

**TABLE S1: Site-directed mutagenesis primers**

| <b>Primer Name</b>            | <b>Sequence 5' - 3'</b>                                          |
|-------------------------------|------------------------------------------------------------------|
| <b>BamAK351E forward</b>      | GTAACCGTTTCTACGTGCGTGAAATCCGTTTTGAAGGTAACG                       |
| <b>BamAK351E reverse</b>      | CGTTACCTTCAAAACGGATTTACGCACGTAGAAACGGTTAC                        |
| <b>BamAD362R forward</b>      | GTAACGATACCTCGAAACGTGCCGTCCTGCGTCGC                              |
| <b>BamAD362R reverse</b>      | 5GCGACGCAGGACGGCACGTTTCGAGGTATCGTTAC                             |
| <b>BamAR366E forward</b>      | GAAAGATGCCGTCCTGGAACGCGAAATGCGTCAG                               |
| <b>BamAR366E reverse</b>      | CTGACGCATTTTCGCGTTCCAGGACGGCATCTTTC                              |
| <b>BamAE373K forward</b>      | GAAATGCGTCAGATGAAGGGTGCATGGCTGGGG                                |
| <b>BamAE373K reverse</b>      | CCCCAGCCATGCACCCTTCATCTGACGCATTTTC                               |
| <b>BamAD362RE373K forward</b> | ATACCTCGAAACGTGCCGTCCTGCGTCGCGAAATGCGTCAGATG<br>AAGGGTGCATGGCTG  |
| <b>BamAD362RE373K reverse</b> | CAGCCATGCACCCTTCATCTGACGCATTTTCGCGACGCAGGACGG<br>CACGTTTCGAGGTAT |
| <b>BamAR366EE373K forward</b> | TGCCGTCCTGGAACGCGAAATGCGTCAGATGAAGGGTGCATGGCT                    |
| <b>BamAR366EE373K reverse</b> | CAGCCATGCACCCTTCATCTGACGCATTTTCGCGTTCCAGGACGGC                   |

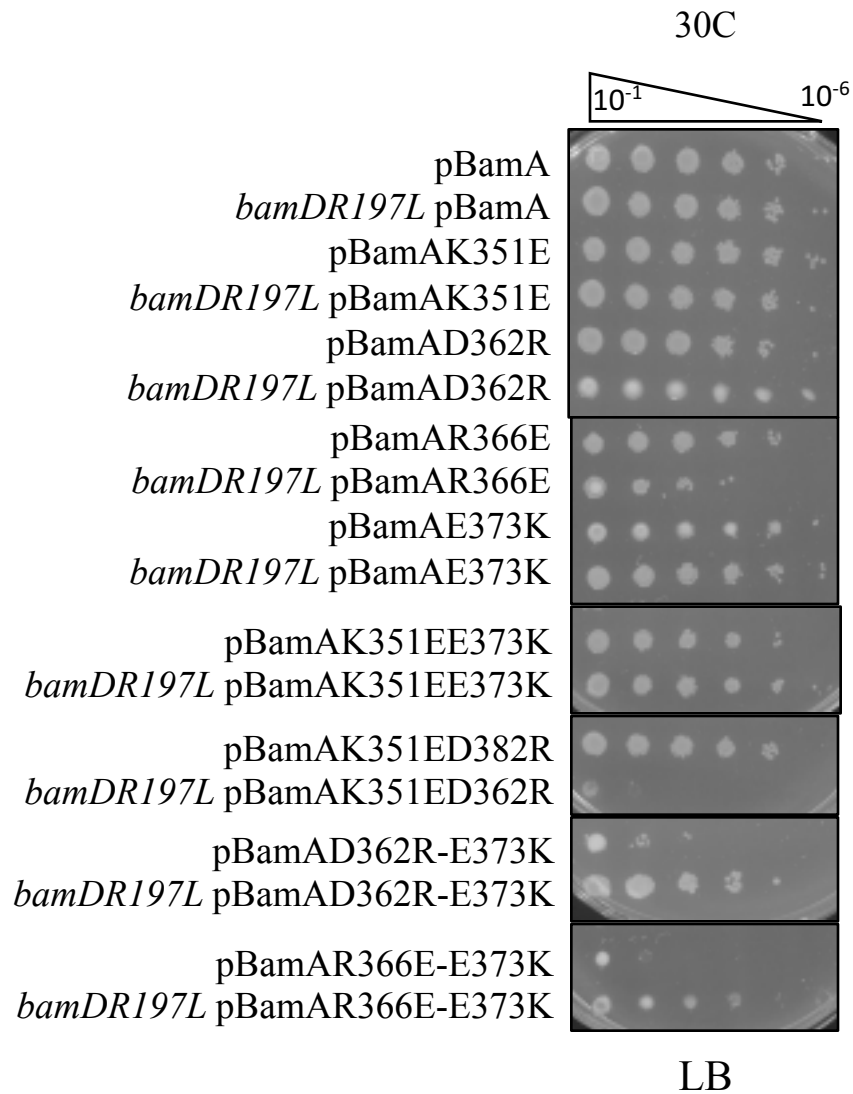

**Supplemental Figure 1.** Growth of charge-change substitutions at 30C.

Strains containing an arabinose-inducible copy of *bamA* (JCM320) as well as pZS21::*bamA*<sup>mut</sup> were grown to stationary phase with arabinose, 10-fold serial dilutions were spotted onto LB medium with 25 ug/mL kanamycin or LB with 25 ug/mL kanamycin and 0.2% arabinose, and plates were incubated overnight at 30 C.

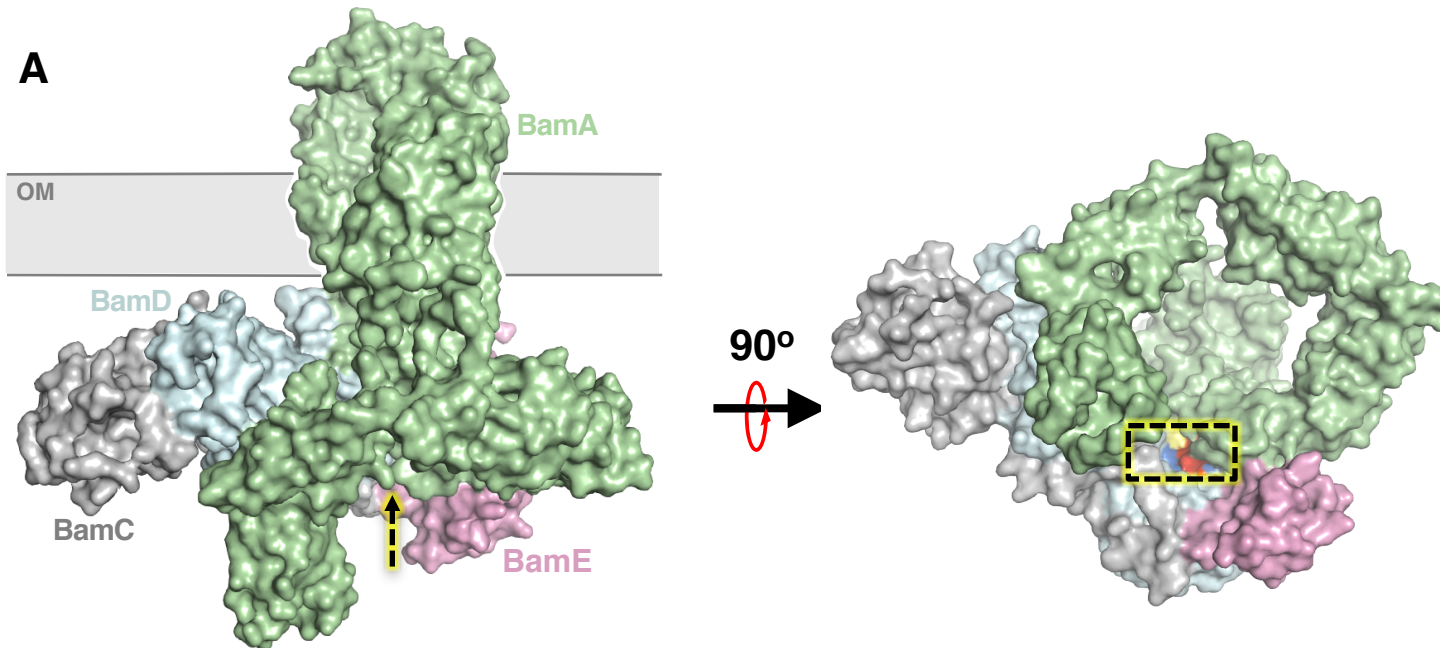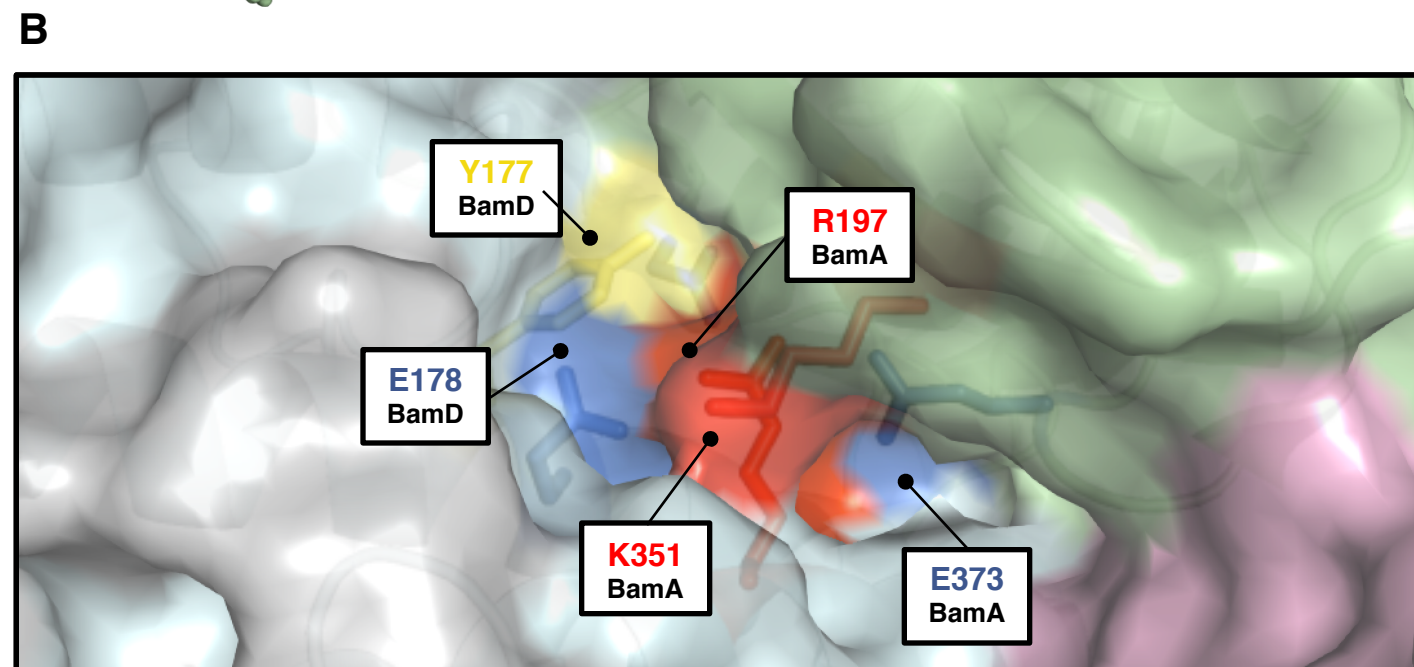

**Supplemental Figure 2.** The electrostatic network at the BamA-BamD interface is exposed to the central cavity formed by the Bam complex. (A) The network of residues connecting BamA and BamD (see Fig. 1B) lies within the central cavity. The solvent-exposed residues are indicated by the inset box and shown in greater detail in (B).
